# Supplementary figures and images for: Inhibition of EZH2 primes the cardiac gene activation via removal of epigenetic repression during human direct cardiac reprogramming
Source: PubMed Central journal article supplement — Stem Cell Res. Author manuscript; Available in PMC 2021 Jun 28. (PMC8238038; doi:10.1016/j.scr.2021.102365), 2021-04-27

# Figure S1

## A

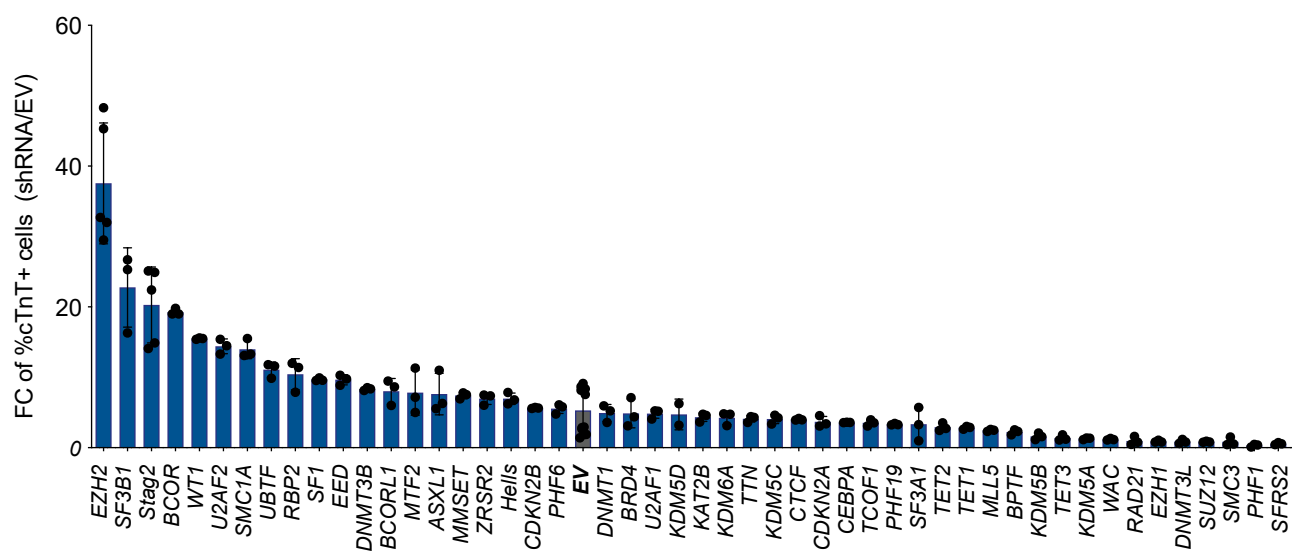

## B

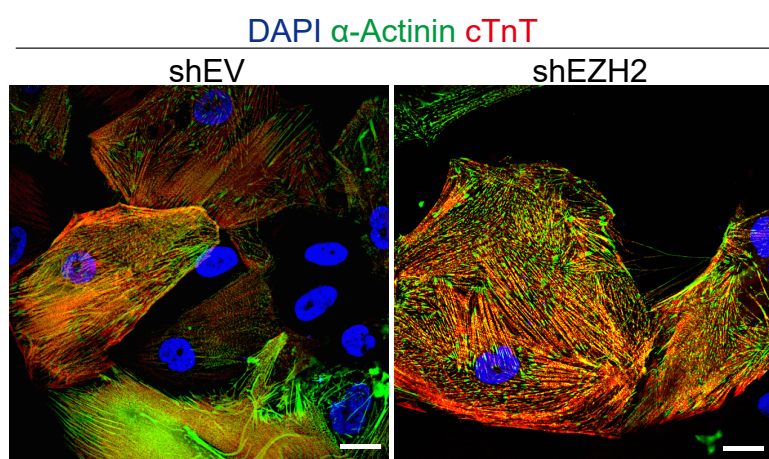

## C

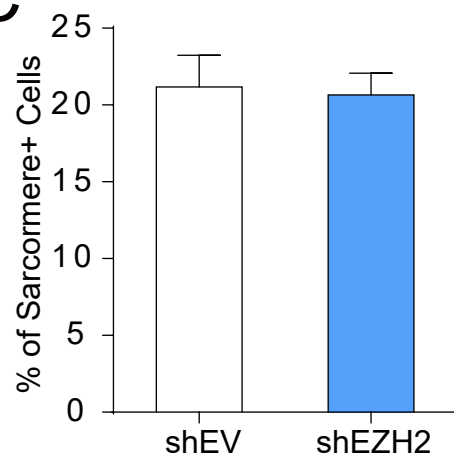

# Figure S2

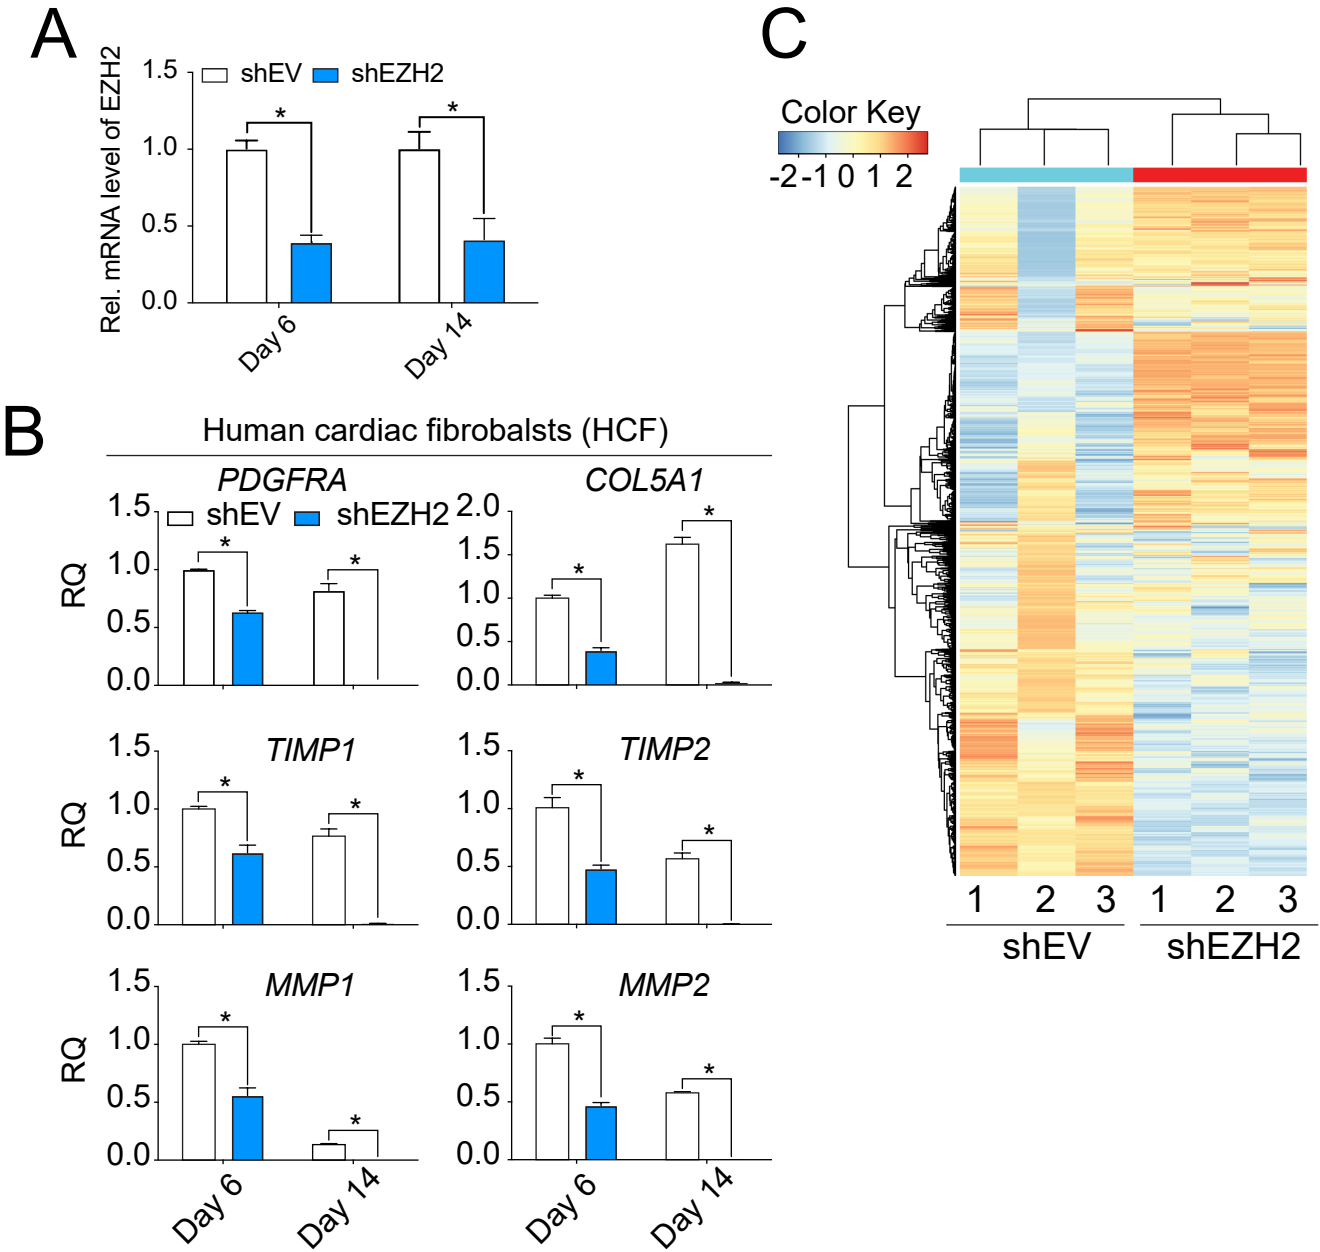

# Figure S3

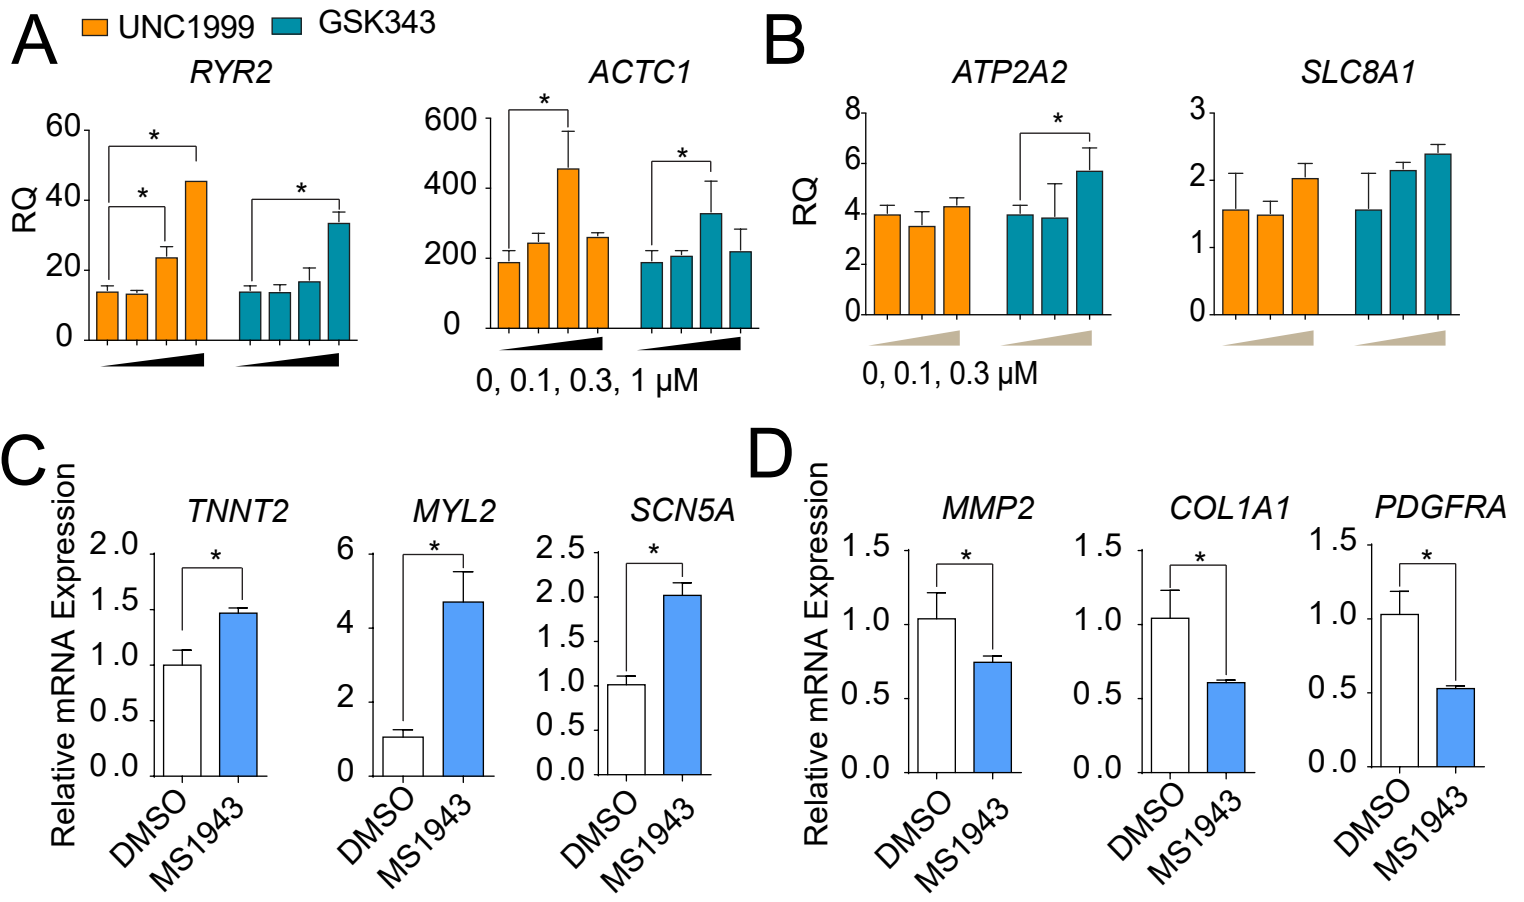

# Figure S4

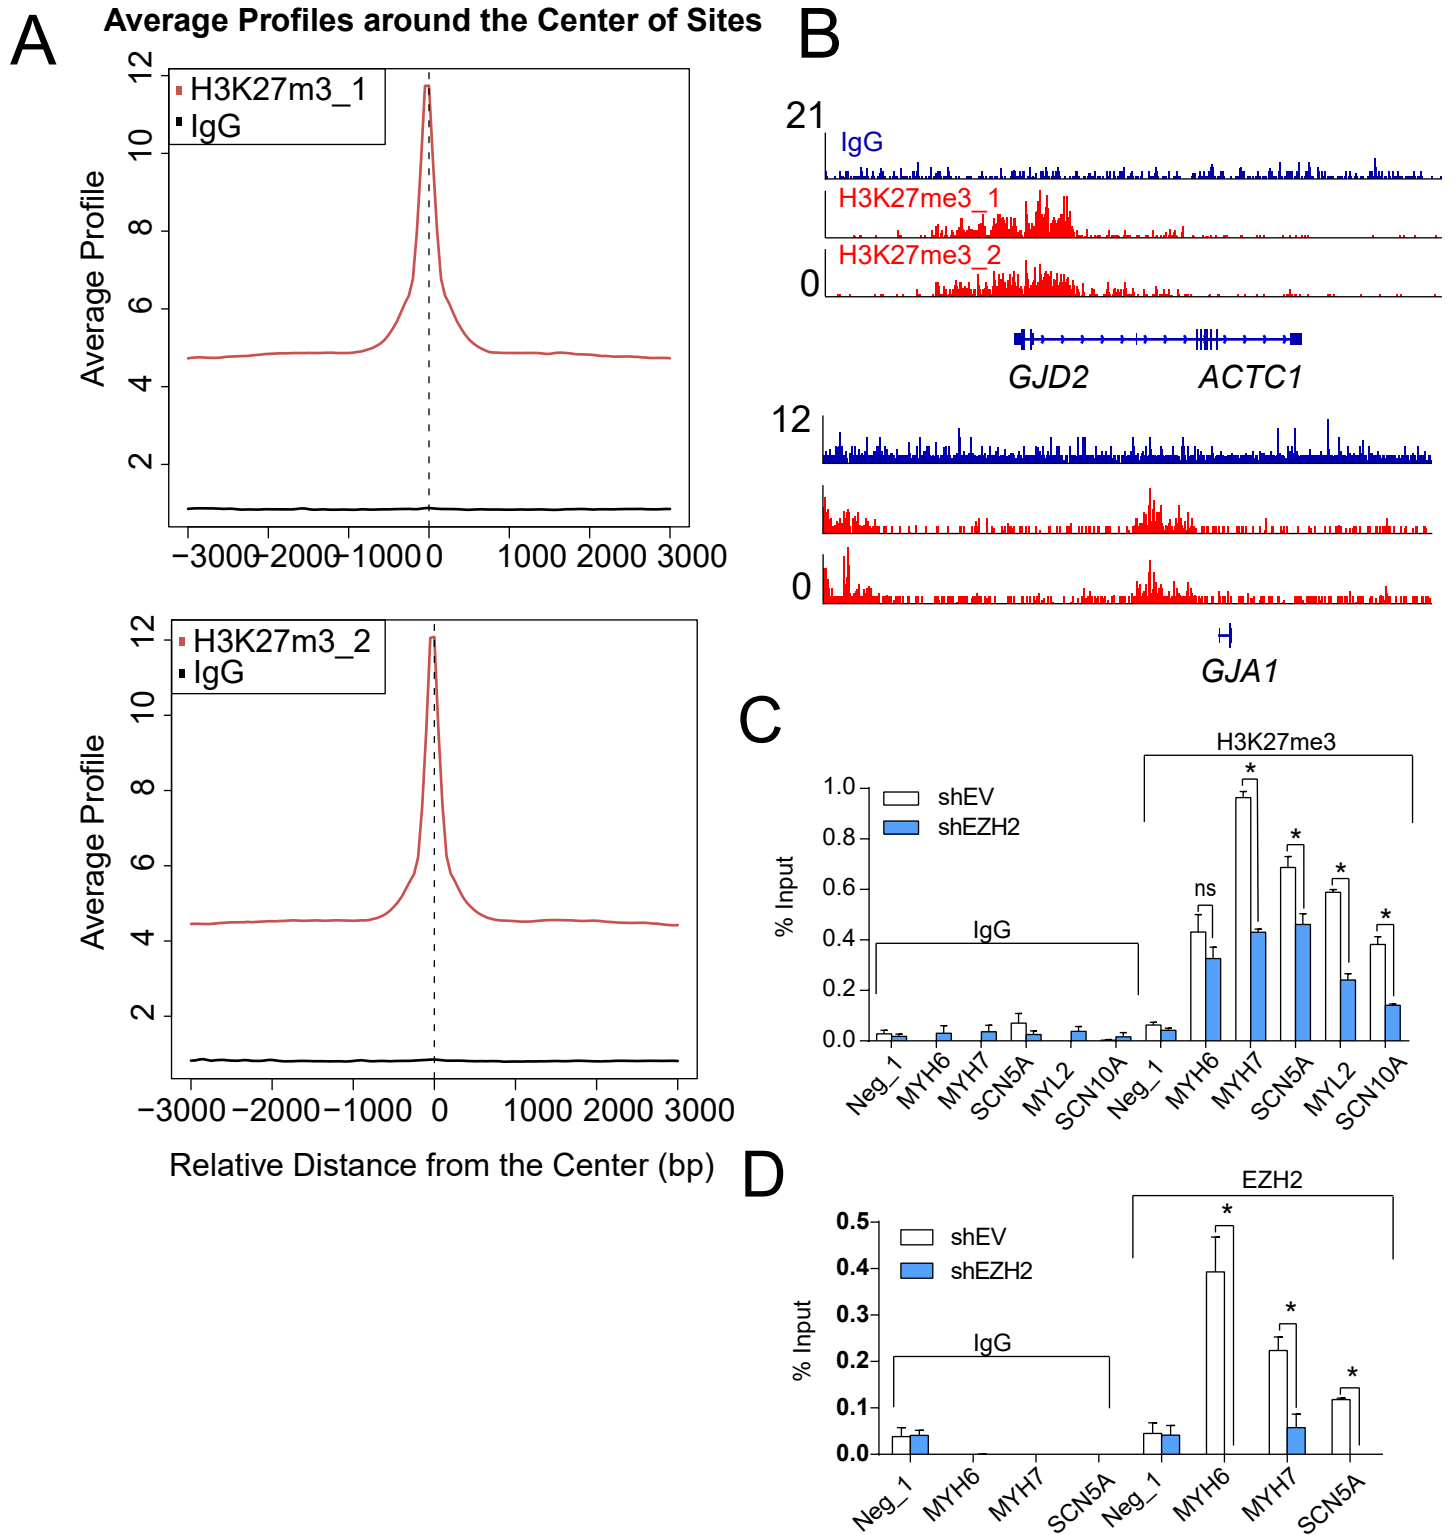

Supplement: NIHMS1709695-supplement-1.pdf [file NIHMS1709695-supplement-1.pdf]
